# Supplementary material for: Physical and Geometric Effects on the Classical Geodetic Observations in Small-Scale Control Networks
Source: Atypon-hosted journal article supplement (doi:10.1061/(asce)su.1943-5428.0000407), 2022-09-27
Supplement: supplemental_materials_su.1943-5428.0000407_bagherbandi.pdf [file supplemental_materials_su.1943-5428.0000407_bagherbandi.pdf]

## SUPPLEMENTAL MATERIALS

*ASCE Journal of Surveying Engineering*

# Physical and Geometric Effects on the Classical Geodetic Observations in Small-Scale Control Networks

Mohammad Bagherbandi, Masoud Shirazian, Jonas Ågren, and  
Milan Horemuz

**DOI:** 10.1061/(ASCE)SU.1943-5428.0000407

© ASCE 2022

[www.ascelibrary.org](http://www.ascelibrary.org)

## Determination of deflection of vertical components using EGMs

The geoid height using normalized spherical harmonic coefficients is given by

$$N(\varphi, \lambda) = \frac{GM}{a\gamma} \sum_{n=2}^{n_{\max}} \sum_{m=0}^n \left(\frac{a}{r}\right)^{n+1} (\Delta\bar{c}_{nm} \cos m\lambda + \bar{s}_{nm} \sin m\lambda) \bar{P}_{nm}(\sin \varphi) \quad (\text{S1})$$

The DOV components, in the meridian and prime vertical directions, at any point of interest on the geoid surface, can be obtained by ((Heiskanen and Moritz 1967), p. 312):

$$\xi = -\frac{1}{R} \frac{\partial N}{\partial \varphi}, \quad (\text{S2})$$

$$\eta = -\frac{1}{R \cos \varphi} \frac{\partial N}{\partial \lambda}, \quad (\text{S3})$$

By inserting Eq. (S1) in Eqs. (S2) and (S3) the DOV components are obtained:

$$\xi(r, \varphi, \lambda) = \frac{GM}{a\gamma r} \sum_{n=2}^{n_{\max}} \sum_{m=0}^n \left(\frac{a}{r}\right)^{n+1} (\Delta\bar{c}_{nm} \cos m\lambda + \bar{s}_{nm} \sin m\lambda) (\bar{P}_{m+1}(\sin \varphi) - m \tan \varphi \bar{P}_{nm}(\sin \varphi)) \quad (\text{S4})$$

$$\eta(r, \varphi, \lambda) = \frac{GM}{a\gamma r \cos \varphi} \sum_{n=2}^{n_{\max}} \sum_{m=0}^n \left(\frac{a}{r}\right)^{n+1} m (\Delta\bar{c}_{nm} \sin m\lambda - \bar{s}_{nm} \cos m\lambda) \bar{P}_{nm}(\sin \varphi) \quad (\text{S5})$$

where  $(r, \varphi, \lambda)$  are the geocentric distance, the latitude and longitude,  $GM$  is the product of the gravitational constant and Earth's mass,  $a$  is the semi-major axis of the reference ellipsoid,  $\Delta\bar{c}_{nm}$  are the difference between the normalized geopotential coefficients and the harmonic coefficient generated by the normal gravity field,  $\bar{s}_{nm}$  are the normalized geopotential coefficients,  $\bar{P}_{nm}$  are the fully normalized Legendre polynomial of degree  $n$  and order  $m$ . The normal gravity  $\gamma$  can be computed at any point on the reference ellipsoid (e.g. GRS80) using Somigliana's formula (Moritz 1984). The geocentric distance (Sjöberg and Bagherbandi 2017, p. 36) can be obtained by:

$$\begin{aligned} X &= (\hat{N} + h) \cos \varphi \cos \lambda \\ Y &= (\hat{N} + h) \cos \varphi \sin \lambda \\ Z &= (\hat{N}(1 - e^2) + h) \sin \varphi \end{aligned} \quad (\text{S6})$$

where  $h$  is ellipsoidal height and  $\widehat{N}$  is prime vertical.

$$\widehat{N} = \frac{a}{\sqrt{1 - e^2 \sin^2 \varphi}} \quad (\text{S7})$$

and finally, the geocentric distance is given by:

$$r = \sqrt{X^2 + Y^2 + Z^2} \quad (\text{S8})$$

### **Evaluation of deflection of verticals using classic astronomical observations**

To evaluate the obtained DOV components (SWEN17 model), one can compare them with those obtained from classic astronomical observations or advanced zenith camera systems (e.g. Hirt and Seeber 2002). We used the classic astronomical observations reported by Ekman and Ågren (2010) to perform this evaluation. They reanalyzed the coordinates of old fundamental observatories using astronomical, satellite positioning (GPS) and gravimetric DOV components in two old observatory towers in Stockholm (established 1748) and København (established in 1637). The Stockholm observatory data can be used to evaluate the obtained DOV components, similar to Ekman and Ågren (2010). The relation between the DOV components and the astronomic  $(\Phi, \Lambda)$  and geodetic  $(\varphi, \lambda)$  latitudes and longitudes are given by ((Heiskanen and Moritz 1967), p. 187):

$$\begin{aligned} \xi^{astro-geo} &= \Phi - \varphi \\ \eta^{astro-geo} &= (\Lambda - \lambda) \cos \varphi \end{aligned} \quad (\text{S9})$$

The geodetic latitude  $\varphi$  and longitude  $\lambda$  of the Stockholm observatory were obtained using GPS observations in The European Terrestrial Reference System 1989 (ETRS89). There are three campaigns for calculating the astronomical latitude  $(\Phi)$  at the Stockholm observatory done by Wargentín (1759), Cronstrand (1811), and Selander (1835). The astronomical longitude  $(\Lambda)$  of the observatory was calculated using the difference between the local time of the Stockholm and Greenwich observatories. The local times are estimated from meridian

transits of stars (see more details in Ekman and Ågren 2010). Two main campaigns were performed by Struve (1844) and Fuss and Nyren (1871) to calculate the longitude of the Stockholm Observatory, and the combined result of both campaigns is  $\Lambda = 18^{\circ}03'29.8''$ . Table S1 (in supplementary materials) summarizes the DOV components obtained by the SWEN17 model and the ones using Eq. (S7). The obtained quantities show that the difference between the SWEN17 model and the DOV obtained from the astronomical coordinates are 0.21 (using an average of  $\xi^{astro-geo}$ ) and 0.08 arc seconds for  $\xi$  and  $\eta$ , respectively. Although the uncertainties of the astronomical latitude ( $\Phi$ ) obtained by different campaigns are not similar, all campaigns results are close to SWEN17 DOV results.

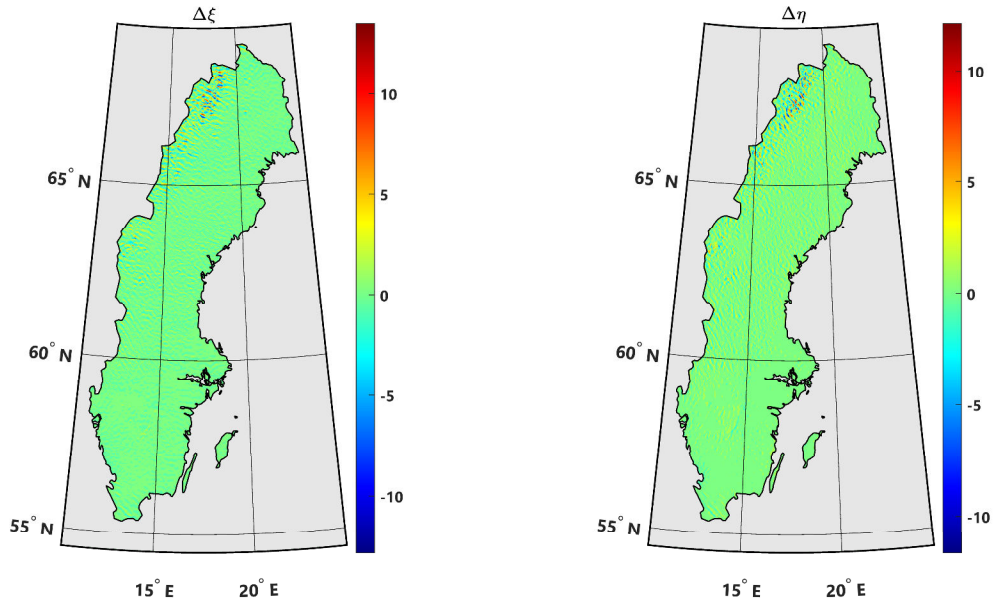

**Fig. S1.** Differences between the north-south ( $\xi$ ) and east-west ( $\eta$ ) components obtained by the SWEN17 and EGM2008 models in Sweden (The differences denoted by  $\Delta$  in the figure). Unit: arc second.

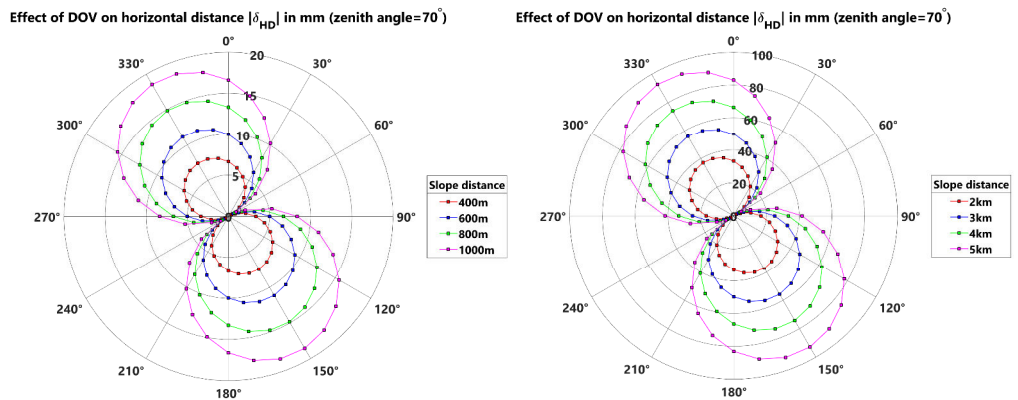

**Fig. S2.** Impact of the DOVs on the horizontal distances considering zenith/vertical angle equal to 70°, different baseline lengths, and azimuth angles using the SWEN17 model in **Kebnekaise** (the polar plots show max absolute value of  $|\delta_{HD}|$ ). Unit: mm.

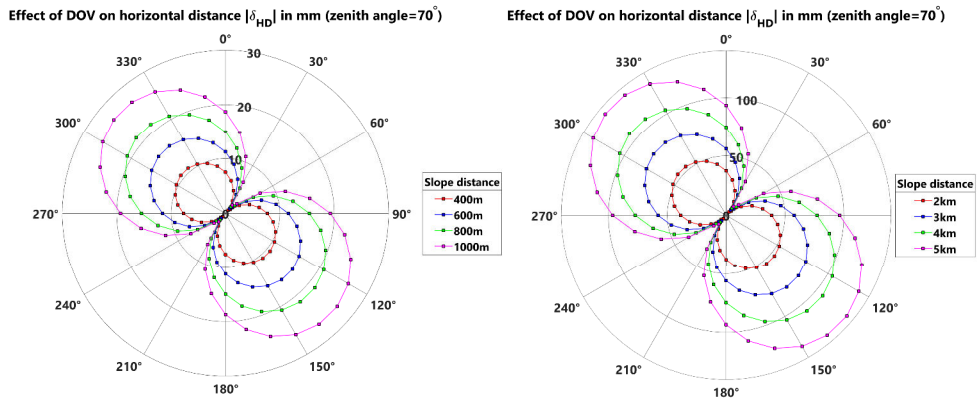

**Fig. S3.** Impact of the DOVs on the horizontal distances considering zenith/vertical angle equal to  $70^\circ$ , different baseline lengths, and azimuth angles using the SWEN17 model in **Umeå** (the polar plots show max absolute value of  $|\delta_{HD}|$ ). Unit: mm.

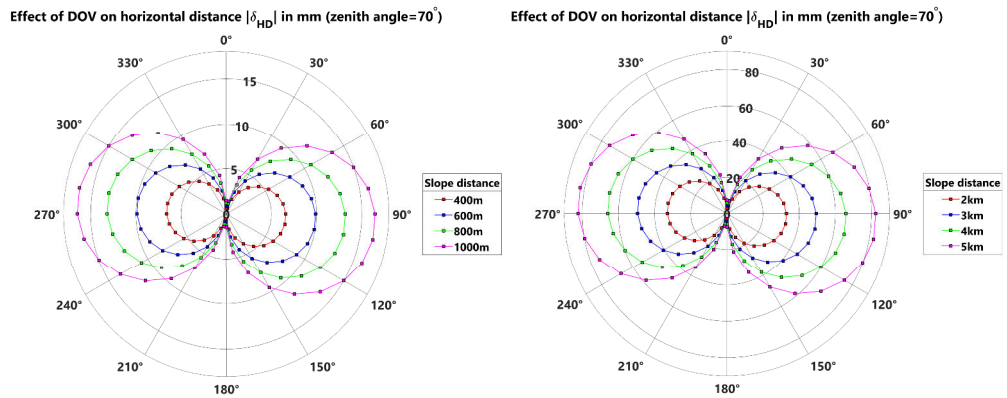

**Fig. S4.** Impact of the DOVs on the horizontal distances considering zenith/vertical angle equal to  $70^\circ$ , different baseline lengths, and azimuth angles using the SWEN17 model in **Mårtsbo** (the polar plots show max absolute value of  $|\delta_{HD}|$ ). Unit: mm.

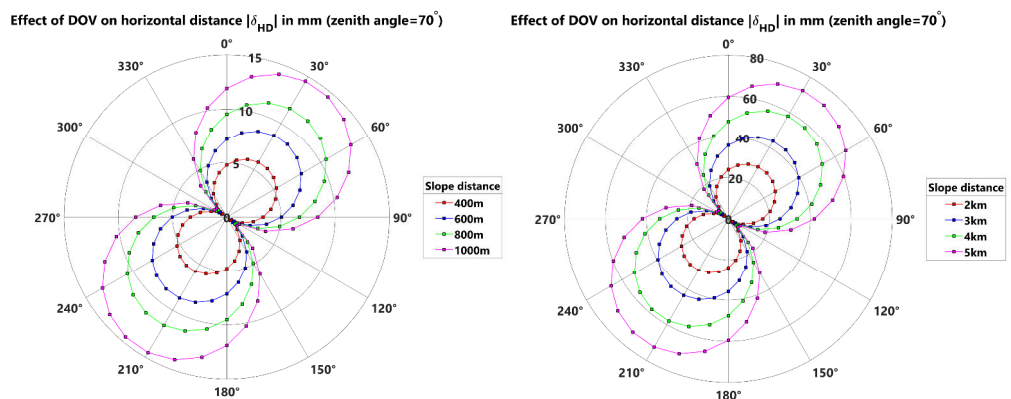

**Fig. S5.** Impact of the DOVs on the horizontal distances considering zenith/vertical angle equal to  $70^\circ$ , different baseline lengths, and azimuth angles using the SWEN17 model in Skövde (the polar plots show max absolute value of  $|\delta_{HD}|$ ). Unit: mm.

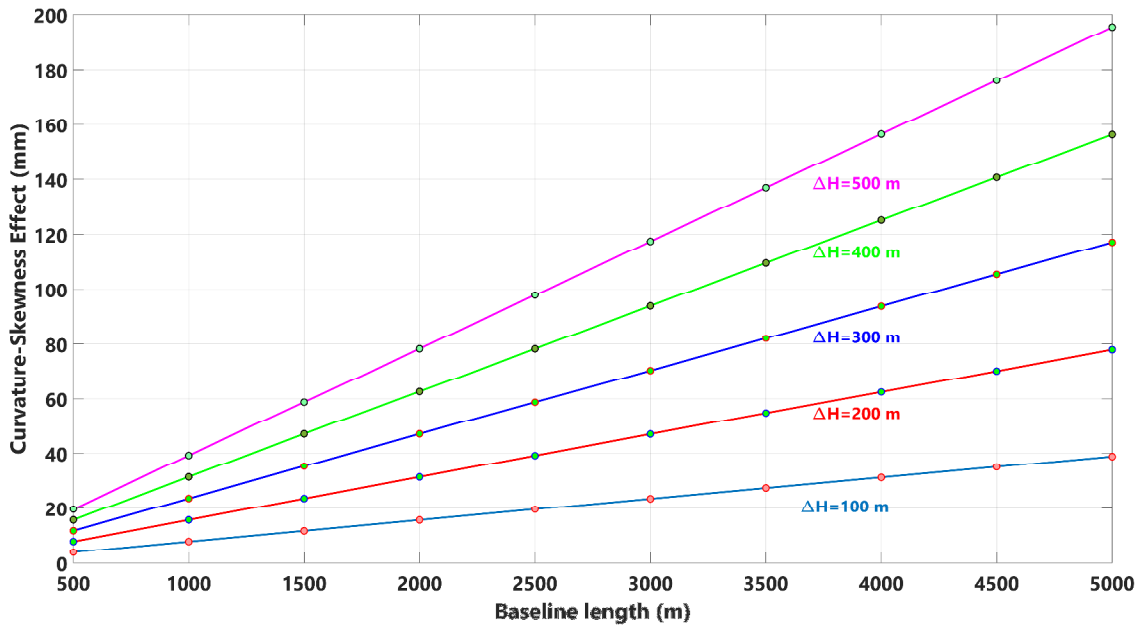

**Fig. S6.** The curvature-skewness effect on the slope distance reduction in reciprocal measurements for different baseline lengths and height differences.

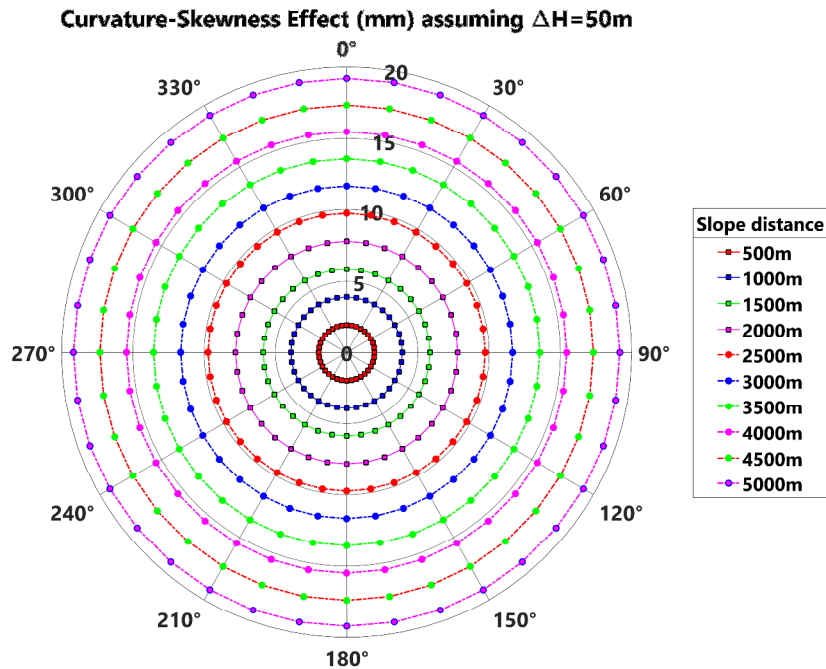

**Fig. S7.** Impact of curvature-skewness error on slope distance reductions assuming different azimuths (varying between  $0^\circ$  to  $360^\circ$  with  $10^\circ$  interval) and 50 m height difference.

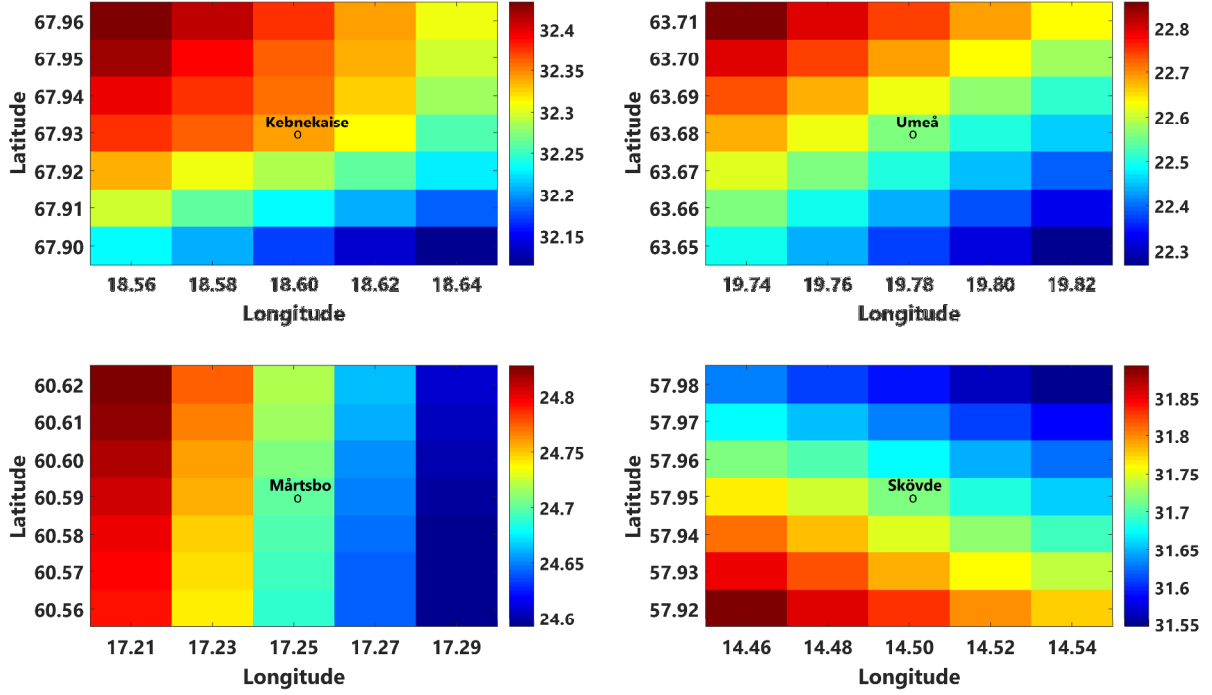

Fig. S8. The geoid height for the grid points at the test areas using the SWEN17 model. Unit: m.

Table S1: Comparison of the DOV component obtained from SWEN17 model and subtraction of astronomical and geodetic coordinates in Stockholm observatory ( $\varphi = 59^\circ 20' 29.16''$ ,  $\lambda = 18^\circ 03' 16.76''$ ). Unit: arc seconds

| DOV component      | Description                                                               | Magnitude |
|--------------------|---------------------------------------------------------------------------|-----------|
| $\xi^{astro-geo}$  | Using (Wargentín 1759)<br>estimation for<br>$\Phi (59^\circ 20' 31.13'')$ | 1.97      |
|                    | Using (Cronstrand 1811)<br>estimation for<br>$\Phi (59^\circ 20' 34.8'')$ | 5.64      |
|                    | Using (Selander 1835)<br>estimation for<br>$\Phi (59^\circ 20' 33.8'')$   | 4.64      |
|                    | <b>Mean value of <math>\xi^{astro-geo}</math></b>                         | 4.08      |
| $\eta^{astro-geo}$ |                                                                           | 6.65      |
| $\xi_{SWEN17}$     |                                                                           | 3.87      |
| $\eta_{SWEN17}$    |                                                                           | 6.57      |



**Table S2.** Statistics of impact of the deflection of the vertical (DOV) on the horizontal distances ( $\delta_{HD}$ ) in **Kebnekaise** (the results are based on the variation of azimuth between 0°-360°).

| Slope distance<br>(m) | Zenith angle = 70°<br>(mm) |      |       |      | Zenith angle = 85°<br>(mm) |      |       |      |
|-----------------------|----------------------------|------|-------|------|----------------------------|------|-------|------|
|                       | Max                        | Mean | Min   | STD  | Max                        | Mean | Min   | STD  |
| <b>400</b>            | 7.4                        | -0.2 | -7.4  | 5.4  | 1.9                        | 0.0  | -1.9  | 1.4  |
| <b>600</b>            | 11.1                       | -0.3 | -11.1 | 8.1  | 2.8                        | -0.1 | -2.8  | 2.1  |
| <b>800</b>            | 14.9                       | -0.4 | -14.9 | 10.7 | 3.8                        | -0.1 | -3.8  | 2.7  |
| <b>1000</b>           | 18.6                       | -0.4 | -18.6 | 13.4 | 4.7                        | -0.1 | -4.7  | 3.4  |
| <b>2000</b>           | 37.1                       | -0.9 | -37.1 | 26.9 | 9.5                        | -0.2 | -9.5  | 6.8  |
| <b>3000</b>           | 55.7                       | -1.3 | -55.7 | 40.3 | 14.2                       | -0.3 | -14.2 | 10.3 |
| <b>4000</b>           | 74.3                       | -1.8 | -74.3 | 53.7 | 18.9                       | -0.5 | -18.9 | 13.7 |
| <b>5000</b>           | 92.8                       | -2.2 | -92.8 | 67.1 | 23.6                       | -0.6 | -23.7 | 17.1 |

**Table S3.** Statistics of impact of the deflection of the vertical (DOV) on the horizontal distances ( $\delta_{HD}$ ) in **Umeå** (the results are based on the variation of azimuth between 0°-360°).

| Slope distance<br>(m) | Zenith angle = 70°<br>(mm) |      |        |      | Zenith angle = 85°<br>(mm) |      |       |      |
|-----------------------|----------------------------|------|--------|------|----------------------------|------|-------|------|
|                       | Max                        | Mean | Min    | STD  | Max                        | Mean | Min   | STD  |
| <b>400</b>            | 10.7                       | -0.2 | -10.7  | 7.7  | 2.7                        | -0.1 | -2.7  | 2.0  |
| <b>600</b>            | 16.1                       | -0.3 | -16.1  | 11.5 | 4.1                        | -0.1 | -4.1  | 2.9  |
| <b>800</b>            | 21.4                       | -0.4 | -21.4  | 15.4 | 5.5                        | -0.1 | -5.5  | 3.9  |
| <b>1000</b>           | 26.8                       | -0.5 | -26.8  | 19.2 | 6.8                        | -0.1 | -6.8  | 4.9  |
| <b>2000</b>           | 53.6                       | -1.0 | -53.6  | 38.5 | 13.6                       | -0.3 | -13.7 | 9.8  |
| <b>3000</b>           | 80.4                       | -1.5 | -80.4  | 57.7 | 20.5                       | -0.4 | -20.5 | 14.7 |
| <b>4000</b>           | 107.2                      | -2.0 | -107.2 | 77.0 | 27.3                       | -0.5 | -27.3 | 19.6 |
| <b>5000</b>           | 134.0                      | -2.5 | -134.0 | 96.2 | 34.1                       | -0.7 | -34.2 | 24.5 |

**Table S4.** Statistics of impact of the deflection of the vertical (DOV) on the horizontal distances ( $\delta_{HD}$ ) in **Mårtsbo** (the results are based on the variation of azimuth between 0°-360°).

| Slope distance<br>(m) | Zenith angle = 70°<br>(mm) |      |       |      | Zenith angle = 85°<br>(mm) |      |       |      |
|-----------------------|----------------------------|------|-------|------|----------------------------|------|-------|------|
|                       | Max                        | Mean | Min   | STD  | Max                        | Mean | Min   | STD  |
| <b>400</b>            | 6.6                        | 0.0  | -6.6  | 4.7  | 1.7                        | 0.0  | -1.7  | 1.2  |
| <b>600</b>            | 9.9                        | 0.0  | -9.9  | 7.0  | 2.5                        | 0.0  | -2.5  | 1.8  |
| <b>800</b>            | 13.2                       | 0.0  | -13.2 | 9.4  | 3.4                        | 0.0  | -3.4  | 2.4  |
| <b>1000</b>           | 16.5                       | 0.0  | -16.5 | 11.7 | 4.2                        | 0.0  | -4.2  | 3.0  |
| <b>2000</b>           | 32.9                       | -0.1 | -32.9 | 23.4 | 8.4                        | 0.0  | -8.4  | 6.0  |
| <b>3000</b>           | 49.4                       | -0.1 | -49.4 | 35.1 | 12.6                       | 0.0  | -12.6 | 8.9  |
| <b>4000</b>           | 65.9                       | -0.2 | -65.9 | 46.8 | 16.8                       | 0.0  | -16.8 | 11.9 |
| <b>5000</b>           | 82.4                       | -0.2 | -82.4 | 58.5 | 21.0                       | -0.1 | -21.0 | 14.9 |

**Table S5.** Statistics of impact of the deflection of the vertical (DOV) on the horizontal distances ( $\delta_{HD}$ ) in **Skövde** (the results are based on the variation of azimuth between 0°-360°).

| Slope distance<br>(m) | Zenith angle = 70°<br>(mm) |      |       |      | Zenith angle = 85°<br>(mm) |      |       |      |
|-----------------------|----------------------------|------|-------|------|----------------------------|------|-------|------|
|                       | Max                        | Mean | Min   | STD  | Max                        | Mean | Min   | STD  |
| <b>400</b>            | 5.8                        | 0.1  | -5.8  | 4.2  | 1.5                        | 0.0  | -1.5  | 1.1  |
| <b>600</b>            | 8.7                        | 0.2  | -8.7  | 6.3  | 2.2                        | 0.0  | -2.2  | 1.6  |
| <b>800</b>            | 11.6                       | 0.3  | -11.6 | 8.4  | 3.0                        | 0.1  | -3.0  | 2.1  |
| <b>1000</b>           | 14.5                       | 0.3  | -14.5 | 10.5 | 3.7                        | 0.1  | -3.7  | 2.7  |
| <b>2000</b>           | 29.0                       | 0.6  | -29.0 | 21.0 | 7.4                        | 0.2  | -7.4  | 5.3  |
| <b>3000</b>           | 43.5                       | 1.0  | -43.5 | 31.5 | 11.1                       | 0.2  | -11.1 | 8.0  |
| <b>4000</b>           | 58.1                       | 1.3  | -58.1 | 41.9 | 14.8                       | 0.3  | -14.8 | 10.7 |
| <b>5000</b>           | 72.6                       | 1.6  | -72.6 | 52.4 | 18.5                       | 0.4  | -18.5 | 13.4 |

**Table S6.** Forward and backward DOV effect on the horizontal distances ( $\delta_{HD}$ ) considering zenith/vertical angle  $85^\circ$ , azimuth equal to  $150^\circ$ , and different baselines in Kebnekaise (Latitude:  $67.93^\circ$ , Longitude:  $18.6^\circ$ , Height: 1702.3m).

| Distance | Latitude          | Longitude         | Height<br>(m) | Forward<br>(mm) | Backward<br>(mm) | Difference<br>(mm) |
|----------|-------------------|-------------------|---------------|-----------------|------------------|--------------------|
| 400      | $67.926884^\circ$ | $18.604787^\circ$ | 1667.7        | 1.9             | 1.9              | 0.0                |
| 600      | $67.925326^\circ$ | $18.607180^\circ$ | 1639.1        | 2.8             | 2.9              | -0.1               |
| 800      | $67.923768^\circ$ | $18.609573^\circ$ | 1605.1        | 3.8             | 4.0              | -0.2               |
| 1000     | $67.922210^\circ$ | $18.611965^\circ$ | 1567.2        | 4.7             | 5.1              | -0.4               |
| 2000     | $67.914419^\circ$ | $18.623922^\circ$ | 1375          | 9.5             | 10.6             | -1.1               |
| 3000     | $67.906628^\circ$ | $18.635871^\circ$ | 1305.7        | 14.2            | 17.9             | -3.7               |
| 4000     | $67.898835^\circ$ | $18.647812^\circ$ | 1369.2        | 18.9            | 25.5             | -6.6               |
| 5000     | $67.891042^\circ$ | $18.659745^\circ$ | 1410.2        | 23.6            | 32.8             | -9.2               |

**Table S7.** Forward and backward DOV effect on the horizontal distances ( $\delta_{HD}$ ) considering zenith/vertical angle  $85^\circ$ , azimuth equal to  $140^\circ$ , and different baselines in Umeå (Latitude:  $63.68^\circ$ , Longitude:  $19.78^\circ$ , Height: 84.0 m).

| Distance | Latitude          | Longitude         | Height<br>(m) | Forward<br>(mm) | Backward<br>(mm) | Difference<br>(mm) |
|----------|-------------------|-------------------|---------------|-----------------|------------------|--------------------|
| 400      | $63.677244^\circ$ | $19.785215^\circ$ | 74.144        | 2.7             | 2.7              | 0.0                |
| 600      | $63.675866^\circ$ | $19.787823^\circ$ | 69.419        | 4.0             | 4.1              | 0.0                |
| 800      | $63.674488^\circ$ | $19.790430^\circ$ | 64.889        | 5.4             | 5.5              | -0.1               |
| 1000     | $63.673109^\circ$ | $19.793036^\circ$ | 60.605        | 6.7             | 6.8              | -0.1               |
| 2000     | $63.666217^\circ$ | $19.806066^\circ$ | 44.325        | 13.5            | 13.5             | 0.0                |
| 3000     | $63.659324^\circ$ | $19.819090^\circ$ | 36.712        | 20.2            | 20.1             | 0.2                |
| 4000     | $63.652430^\circ$ | $19.832107^\circ$ | 34.081        | 26.9            | 26.4             | 0.6                |
| 5000     | $63.645535^\circ$ | $19.845118^\circ$ | 31.575        | 33.7            | 32.6             | 1.1                |

**Table S8.** Forward and backward DOV effect on the horizontal distances ( $\delta_{HD}$ ) considering zenith/vertical angle  $85^\circ$ , azimuth equal to  $100^\circ$ , and different baselines in Mårtsbo (Latitude:  $60.595143^\circ$ , Longitude:  $17.258525^\circ$ , Height: 32.0 m).

| Distance | Latitude          | Longitude         | Height<br>(m) | Forward<br>(mm) | Backward<br>(mm) | Difference<br>(mm) |
|----------|-------------------|-------------------|---------------|-----------------|------------------|--------------------|
| 400      | $60.594518^\circ$ | $17.265741^\circ$ | 32.125        | 1.7             | 1.7              | 0.0                |
| 600      | $60.594205^\circ$ | $17.269349^\circ$ | 30.979        | 2.5             | 2.5              | 0.0                |
| 800      | $60.593893^\circ$ | $17.272957^\circ$ | 30.419        | 3.3             | 3.4              | 0.0                |
| 1000     | $60.593580^\circ$ | $17.276565^\circ$ | 29.871        | 4.2             | 4.2              | 0.0                |
| 2000     | $60.592014^\circ$ | $17.294604^\circ$ | 29.338        | 8.4             | 8.4              | 0.0                |
| 3000     | $60.590446^\circ$ | $17.312640^\circ$ | 26.915        | 12.5            | 12.2             | 0.3                |
| 4000     | $60.588876^\circ$ | $17.330675^\circ$ | 24.892        | 16.7            | 16.0             | 0.7                |
| 5000     | $60.587303^\circ$ | $17.348709^\circ$ | 23.065        | 20.9            | 20.0             | 0.9                |

**Table S9.** Forward and backward DOV effect on the horizontal distances ( $\delta_{HD}$ ) considering zenith/vertical angle  $85^\circ$ , azimuth equal to  $30^\circ$ , and different baselines in Skövde (Latitude:  $57.95^\circ$ , Longitude:  $14.50^\circ$ , Height: 262.0 m).

| Distance | Latitude          | Longitude         | Height<br>(m) | Forward<br>(mm) | Backward<br>(mm) | Difference<br>(mm) |
|----------|-------------------|-------------------|---------------|-----------------|------------------|--------------------|
| 400      | $57.953116^\circ$ | $14.503390^\circ$ | 258.44        | 1.5             | 1.5              | 0.0                |
| 600      | $57.954674^\circ$ | $14.505086^\circ$ | 256.23        | 2.3             | 2.2              | 0.0                |
| 800      | $57.956231^\circ$ | $14.506781^\circ$ | 253.76        | 3.0             | 3.0              | 0.1                |
| 1000     | $57.957789^\circ$ | $14.508477^\circ$ | 251.05        | 3.8             | 3.7              | 0.1                |
| 2000     | $57.965578^\circ$ | $14.516957^\circ$ | 235.23        | 7.6             | 7.1              | 0.5                |
| 3000     | $57.973366^\circ$ | $14.525441^\circ$ | 219.23        | 11.3            | 10.4             | 0.9                |
| 4000     | $57.981153^\circ$ | $14.533929^\circ$ | 207.59        | 15.1            | 13.5             | 1.6                |
| 5000     | $57.988940^\circ$ | $14.542420^\circ$ | 203.12        | 18.9            | 16.7             | 2.2                |

**Table S10.** Computed geoid for the grid points at the test areas using the SWEN17 model.

| Kebnekaise            |                       |          | Umeå                  |                       |          | Skövde                |                       |          | Mårtsbo               |                       |          |
|-----------------------|-----------------------|----------|-----------------------|-----------------------|----------|-----------------------|-----------------------|----------|-----------------------|-----------------------|----------|
| $\varphi$<br>(degree) | $\lambda$<br>(degree) | N<br>(m) |
| 67.96                 | 18.56                 | 32.433   | 63.71                 | 19.74                 | 22.859   | 57.98                 | 14.46                 | 31.631   | 60.62514              | 17.21853              | 24.827   |
| 67.96                 | 18.58                 | 32.409   | 63.71                 | 19.76                 | 22.803   | 57.98                 | 14.48                 | 31.610   | 60.62514              | 17.23852              | 24.773   |
| 67.96                 | 18.60                 | 32.376   | 63.71                 | 19.78                 | 22.746   | 57.98                 | 14.50                 | 31.590   | 60.62514              | 17.25852              | 24.719   |
| 67.96                 | 18.62                 | 32.340   | 63.71                 | 19.80                 | 22.687   | 57.98                 | 14.52                 | 31.568   | 60.62514              | 17.27852              | 24.665   |
| 67.96                 | 18.64                 | 32.305   | 63.71                 | 19.82                 | 22.634   | 57.98                 | 14.54                 | 31.547   | 60.62514              | 17.29852              | 24.609   |
| 67.95                 | 18.56                 | 32.421   | 63.70                 | 19.74                 | 22.798   | 57.97                 | 14.46                 | 31.676   | 60.61514              | 17.21853              | 24.820   |
| 67.95                 | 18.58                 | 32.389   | 63.70                 | 19.76                 | 22.744   | 57.97                 | 14.48                 | 31.653   | 60.61514              | 17.23852              | 24.767   |
| 67.95                 | 18.60                 | 32.361   | 63.70                 | 19.78                 | 22.684   | 57.97                 | 14.50                 | 31.631   | 60.61514              | 17.25852              | 24.714   |
| 67.95                 | 18.62                 | 32.335   | 63.70                 | 19.80                 | 22.629   | 57.97                 | 14.52                 | 31.608   | 60.61514              | 17.27852              | 24.659   |
| 67.95                 | 18.64                 | 32.298   | 63.70                 | 19.82                 | 22.576   | 57.97                 | 14.54                 | 31.586   | 60.61514              | 17.29852              | 24.604   |
| 67.94                 | 18.56                 | 32.396   | 63.69                 | 19.74                 | 22.738   | 57.96                 | 14.46                 | 31.719   | 60.60514              | 17.21853              | 24.814   |
| 67.94                 | 18.58                 | 32.377   | 63.69                 | 19.76                 | 22.681   | 57.96                 | 14.48                 | 31.698   | 60.60514              | 17.23852              | 24.760   |
| 67.94                 | 18.60                 | 32.355   | 63.69                 | 19.78                 | 22.623   | 57.96                 | 14.50                 | 31.672   | 60.60514              | 17.25852              | 24.706   |
| 67.94                 | 18.62                 | 32.326   | 63.69                 | 19.80                 | 22.570   | 57.96                 | 14.52                 | 31.647   | 60.60514              | 17.27852              | 24.653   |
| 67.94                 | 18.64                 | 32.282   | 63.69                 | 19.82                 | 22.517   | 57.96                 | 14.54                 | 31.623   | 60.60514              | 17.29852              | 24.600   |
| 67.93                 | 18.56                 | 32.375   | 63.68                 | 19.74                 | 22.678   | 57.95                 | 14.46                 | 31.764   | 60.59514              | 17.21853              | 24.807   |
| 67.93                 | 18.58                 | 32.363   | 63.68                 | 19.76                 | 22.620   | 57.95                 | 14.48                 | 31.742   | 60.59514              | 17.23852              | 24.754   |
| 67.93                 | 18.60                 | 32.339   | 63.68                 | 19.78                 | 22.563   | 57.95                 | 14.50                 | 31.714   | 60.59514              | 17.25852              | 24.702   |
| 67.93                 | 18.62                 | 32.310   | 63.68                 | 19.80                 | 22.508   | 57.95                 | 14.52                 | 31.684   | 60.59514              | 17.27852              | 24.648   |
| 67.93                 | 18.64                 | 32.256   | 63.68                 | 19.82                 | 22.454   | 57.95                 | 14.54                 | 31.659   | 60.59514              | 17.29852              | 24.597   |
| 67.92                 | 18.56                 | 32.335   | 63.67                 | 19.74                 | 22.617   | 57.94                 | 14.46                 | 31.807   | 60.58514              | 17.21853              | 24.801   |
| 67.92                 | 18.58                 | 32.307   | 63.67                 | 19.76                 | 22.559   | 57.94                 | 14.48                 | 31.780   | 60.58514              | 17.23852              | 24.749   |
| 67.92                 | 18.60                 | 32.286   | 63.67                 | 19.78                 | 22.501   | 57.94                 | 14.50                 | 31.750   | 60.58514              | 17.25852              | 24.697   |
| 67.92                 | 18.62                 | 32.263   | 63.67                 | 19.80                 | 22.445   | 57.94                 | 14.52                 | 31.722   | 60.58514              | 17.27852              | 24.644   |
| 67.92                 | 18.64                 | 32.227   | 63.67                 | 19.82                 | 22.392   | 57.94                 | 14.54                 | 31.697   | 60.58514              | 17.29852              | 24.593   |
| 67.91                 | 18.56                 | 32.295   | 63.66                 | 19.74                 | 22.555   | 57.93                 | 14.46                 | 31.849   | 60.57514              | 17.21853              | 24.795   |
| 67.91                 | 18.58                 | 32.264   | 63.66                 | 19.76                 | 22.497   | 57.93                 | 14.48                 | 31.818   | 60.57514              | 17.23852              | 24.743   |
| 67.91                 | 18.60                 | 32.230   | 63.66                 | 19.78                 | 22.440   | 57.93                 | 14.50                 | 31.788   | 60.57514              | 17.25852              | 24.693   |
| 67.91                 | 18.62                 | 32.207   | 63.66                 | 19.80                 | 22.383   | 57.93                 | 14.52                 | 31.760   | 60.57514              | 17.27852              | 24.642   |
| 67.91                 | 18.64                 | 32.181   | 63.66                 | 19.82                 | 22.330   | 57.93                 | 14.54                 | 31.737   | 60.57514              | 17.29852              | 24.593   |
| 67.90                 | 18.56                 | 32.231   | 63.65                 | 19.74                 | 22.494   | 57.92                 | 14.46                 | 31.892   | 60.56514              | 17.21853              | 24.792   |
| 67.90                 | 18.58                 | 32.206   | 63.65                 | 19.76                 | 22.436   | 57.92                 | 14.48                 | 31.858   | 60.56514              | 17.23852              | 24.740   |
| 67.90                 | 18.60                 | 32.172   | 63.65                 | 19.78                 | 22.379   | 57.92                 | 14.50                 | 31.831   | 60.56514              | 17.25852              | 24.691   |
| 67.90                 | 18.62                 | 32.137   | 63.65                 | 19.80                 | 22.322   | 57.92                 | 14.52                 | 31.799   | 60.56514              | 17.27852              | 24.641   |
| 67.90                 | 18.64                 | 32.115   | 63.65                 | 19.82                 | 22.269   | 57.98                 | 14.43                 | 31.659   | 60.56514              | 17.29852              | 24.592   |

**Table S11.** The curvature-skewness angle in Umeå.

| Baseline length<br>(m) | Vertical skewness<br>(d°, m', s") |
|------------------------|-----------------------------------|
| 0988.77                | 0, 0, 31.90                       |
| 1490.18                | 0, 0, 48.11                       |
| 1977.54                | 0, 1, 03.81                       |
| 2439.03                | 0, 1, 18.77                       |
| 2980.59                | 0, 1, 36.23                       |
| 3487.45                | 0, 1, 52.63                       |
| 3955.07                | 0, 2, 07.61                       |
| 4541.38                | 0, 2, 26.58                       |
| 5181.00                | 0, 2, 47.26                       |

**Table S12.** The curvature-skewness angle in Skövde.

| Baseline length<br>(m) | Vertical skewness<br>(d°, m', s") |
|------------------------|-----------------------------------|
| 1113.78                | 0, 0, 36.00                       |
| 1625.16                | 0, 0, 52.48                       |
| 2227.55                | 0, 1, 12.00                       |
| 2522.50                | 0, 1, 21.50                       |
| 3250.56                | 0, 1, 44.97                       |
| 3544.84                | 0, 1, 54.55                       |
| 4095.14                | 0, 2, 12.29                       |
| 4455.10                | 0, 2, 23.99                       |
| 5045.31                | 0, 2, 43.01                       |

**Table S13.** The curvature-skewness angle in Mårtsbo.

| Baseline length<br>(m) | Vertical skewness<br>(d°, m', s") |
|------------------------|-----------------------------------|
| 1094.34                | 0, 0, 35.31                       |
| 1561.87                | 0, 0, 50.43                       |
| 2189.22                | 0, 1, 10.64                       |
| 2482.81                | 0, 1, 20.20                       |
| 3124.37                | 0, 1, 40.89                       |
| 3517.42                | 0, 1, 53.64                       |
| 3996.34                | 0, 2, 09.08                       |
| 4519.17                | 0, 2, 25.84                       |
| 4589.46                | 0, 2, 28.28                       |
| 4966.16                | 0, 2, 40.42                       |

## References:

- Cronstrand, S. A. (1811). *Stockholms observatorii pol-högd bestämd.*
- Ekman, M., & Ågren, J. (2010). *Reanalysing astronomical coordinates of old fundamental observatories using satellite positioning and deflections of the vertical.* Summer Institute for Historical Geophysics Åland Islands.
- Fuss, V., & Nyren, M. (1871). *Bestimmung der Längen-Differenz zwischen den Sternwarten Stockholm und Helsingfors. Memoires de l'Academie Imperiale des Sciences.*
- Heiskanen, W. A., & Moritz, H. (1967). *Physical Geodesy.* WH Freeman and Company. San Francisco, CA.
- Hirt, C., & Seeber, G. (2002). Astrogeodätische Lotabweichungsbestimmung mit dem digitalen Zenitkameranystem TZK2-D. *ZfV - Zeitschrift Fuer Geodaesie, Geoinformation Und Landmanagement*, 127(1), 388–396.
- Moritz, H. (1984). Geodetic reference system 1980. *Bulletin Géodésique*, 58(3), 388–398.
- Selander, N. H. (1835). *Undersökning om Stockholms observatorii polhöjd.*
- Sjöberg, L. E., & Bagherbandi, M. (2017). *Gravity inversion and integration.* Springer.
- Struve, F. G. W. (1844). *Expedition chronometrique execeutee par ordre de sa majeste l'empereur Nicolas Ier entre Poulkova et Altona pour la determination de la longitude géographique relative de l'observatoire central de Russie.*
- Wargentín, P. (1759). *Stockholms observatorii pol-högd bestämd.*
